## The molecular basis for spectral tuning of rod visual pigments in deep-sea fish

David M. Hunt<sup>1,\*</sup>, Kanwaljit S. Dulai<sup>1</sup>, Julian C. Partridge<sup>3</sup>, Philippa Cottrill<sup>1</sup>  
and James K. Bowmaker<sup>2</sup>

Departments of <sup>1</sup>Molecular Genetics and <sup>2</sup>Visual Science, Institute of Ophthalmology, University College London, Bath Street, London, EC1V 9EL, UK and <sup>3</sup>School of Biological Sciences, University of Bristol, Bristol, BS8 1UG, UK

\*Author for correspondence (e-mail: d.hunt@ucl.ac.uk)

Accepted 2 July 2001

### Summary

Most species of deep-sea fish possess of a rod-only retina with a pigment that is generally shortwave shifted in  $\lambda_{\max}$  towards the blue region of the spectrum. In addition, the  $\lambda_{\max}$  values of different species tend to cluster at particular points in the spectrum. In this study, the rod opsin gene sequences from 28 deep-sea fish species drawn from seven different Orders are compared. The  $\lambda_{\max}$  values of the rod pigments vary from approximately 520 nm to <470 nm, with the majority lying between 490 nm and 477 nm. The 520 nm pigment in two species of dragon fish is associated with a Phe261Tyr substitution, whereas the shortwave shifts of the pigments in the other

26 species are accountable by substitutions at a further eight sites (83, 122, 124, 132, 208, 292, 299 and 300). Clustering of  $\lambda_{\max}$  values does not, however, involve a common subset of these substitutions in the different species. A phylogenetic analysis predicts that the pigment in the ancestral species would have had a  $\lambda_{\max}$  of approximately 480 nm. A total of 27 changes is required to generate the pattern of substitutions seen in the different species, with many sites undergoing multiple changes.

Key words: opsin, visual pigment, rod photoreceptor, deep-sea fish, spectral tuning, evolution.

### Introduction

The ambient light of the deep-sea is composed of dim blue downwelling daylight and bioluminescence (Marshall, 1979). However, the intensity of downwelling light diminishes rapidly with increasing depth, and the limit of scotopic vision has been calculated to be at about 1000 m in the clearest tropical oceans (Denton, 1990). The visual systems of deep-sea fish show numerous adaptations to this photon-limited visual environment, including the loss of cone photoreceptors to give a rod-only retina, an unusually high amount of visual pigment in the photoreceptors (Denton and Warren, 1957; Partridge et al., 1988; Partridge et al., 1989), large photoreceptor size (Munk, 1966), and the wavelength of maximal absorbance of visual pigments shortwave (SW)-shifted from around 500 nm of the majority of rod visual pigments to around 480 nm to match the wavelength of maximal spectral transmission of oceanic waters (Denton and Warren, 1957; Muntz, 1958). This SW-shifted sensitivity also correlates well with the blue bioluminescence emitted by photophores present on many species of deep-sea fish (Nicol, 1969; Herring, 1983; Douglas et al., 1998b).

Vertebrate visual pigments are composed of an opsin protein of approx. 350 amino acid residues that forms seven  $\alpha$ -helical transmembrane regions connected by cytoplasmic and luminal loops (Dratz and Hargrave, 1983; Findlay and Pappin, 1986), covalently attached *via* a protonated Schiff-base linkage to a chromophore. Each visual pigment shows a peak of maximal

absorbance ( $\lambda_{\max}$ ), the precise location depending on interactions between the chromophore and specific amino acid residues of the opsin protein. In a previous study of visual pigments in four species of deep-sea fish with rod-only retinas containing visual pigments with  $\lambda_{\max}$  values ranging from 483 nm to 468 nm (Hope et al., 1997), a number of candidate amino acid substitutions for spectral tuning were identified. However, the small number of species studied precluded a more detailed analysis of the mechanism of spectral tuning. A feature of deep-sea fish rod pigments is that their  $\lambda_{\max}$  values tend to cluster at particular points in the spectrum rather than forming a continuous distribution (Bridges, 1965; Dartnall and Lythgoe, 1965; Partridge et al., 1989). The molecular basis for this phenomenon is unknown but could clearly be dependent on a common set of amino acid replacements, where each discrete shift in  $\lambda_{\max}$  is achieved in all species by the same amino acid substitution.

In order to examine this and to determine whether the mechanism of spectral tuning proposed by Hope et al. (Hope et al., 1997) is of general applicability to the rod visual pigments of deep-sea fish, we have now extended the analysis to a much larger group of species drawn from seven different Orders of the Euteleostei, the Aulopiformes, Beryciformes, Gadiformes, Myctophiformes, Ophidiiformes, Osmeriformes and Stomiiformes. With only two exceptions, all the species studied possess only a single rhodopsin pigment in the retina

(Ali and Anctil, 1976; Fröhlich et al., 1995; Partridge et al., 1988; Partridge et al., 1989; Douglas et al., 1995), indicating that only a single rod opsin gene is expressed in the photoreceptors. The exceptions are two species of dragon fish, *Aristostomias tittmanni* and *Malacosteus niger*. These species emit bioluminescent light with maxima beyond 700 nm (Widder et al., 1984), in addition to the more usual blue light. *M. niger* possesses a rhodopsin/porphyropsin pigment pair with  $\lambda_{\max}$  values of 517 nm and 550 nm, respectively. These pigments are based on a single rod opsin gene but with retinal or 3,4-dehydroretinal, respectively, as chromophore (Bowmaker et al., 1988; Douglas et al., 1998b). In addition, however, *M. niger* uses a remarkable photosensitizer based on a mixture of defarnesylated and demetallated derivatives of bacteriochlorophylls *c* and *d* in the retina to enhance the sensitivity of the 'pigment pair' to its own longwave (LW) radiation (Bowmaker et al., 1988; Douglas et al., 1999a). The closely related species, *A. tittmanni*, lacks the photosensitizer. Instead, as well as possessing a rhodopsin/porphyropsin 'pigment pair' with  $\lambda_{\max}$  values of 523 nm and 551 nm, it has a third pigment with a  $\lambda_{\max}$  of 581 nm, based most probably on a second opsin protein.

## Materials and methods

### Collection of samples

Deep-sea fish were caught from the NERC research ship RRS Challenger during cruises 113 in 1994 and 122 in 1995, by deep trawling with either a semi-balloon otter trawl (Merrett and Marshall, 1981) or a rectangular midwater trawl combination net, from depths between 600 m and 5000 m, in the area of the Porcupine Sea Bight abyssal slope region (49°27'N, 11°29'W to 49°59'N, 13°12'W) or the Tagus and Horseshoe abyssal plains (31°15', 17°00' to 38°45', 12°10') of the North Eastern Atlantic. Fish were also collected from the western Atlantic in the region of the Bahamas and South Coast of South Carolina, using a similar midwater trawl on two cruises of the R/V Edwin Link (Harbor Branch Oceanographic Institute, Florida, USA). All fish were dead when brought to the surface. Dissected tissue samples or whole fish were either rapidly cooled to -80°C for storage or placed in absolute ethanol prior to storage at -20°C.

### Sequencing of the rod opsin gene

The region of the rod opsin gene that encodes the seven  $\alpha$ -helices and associated cytoplasmic and luminal loops was amplified by polymerase chain reaction (PCR) and sequenced. Genomic DNA was extracted from liver or whole body samples by a standard phenol/chloroform extraction protocol. The first-round PCR amplifications utilised an oligonucleotide primer pair Frho91F (5'-CATATGAATACCCTCAGTACT-ACC-3') and Frho956R (5'-CCATTACCCATGTAAATG-CAATTCCTG-3') that amplifies a fragment from nucleotides 91 to 956. Where an amplified product was not visible on an agarose gel, a second nested PCR was carried out using primer pair Frho173F (5'-TGTA AACGACGGCCAGTCTTCCCY-

RTCAACTTCCTCAC-3') and Frho913R (5'-CAGGAAAC-AGCTATGACCTGCTTGTTCAGWCAGATGTAG-3'). The 5' region of the gene was amplified using primer pair Frho16F (5'-WWWWWATGAACGGYACRGAGG-3') and Frho229R (5'-AGAGGTYRGCMACNGCCAGGTTSAG-3').

Each PCR contained approximately 100 ng of template DNA, 12.5  $\mu\text{mol l}^{-1}$  of each primer, 0.2  $\text{mmol l}^{-1}$  each of dATP, dCTP, dGTP and dTTP, 4  $\text{mmol l}^{-1}$   $\text{Mg}_2\text{Cl}_2$ , 0.5 unit of *Taq* polymerase and 5  $\mu\text{l}$  of reaction buffer in a final volume of 50  $\mu\text{l}$ . Following an initial denaturation for 3 min at 94°C, 35 cycles were used with an annealing temperature of 56°C, an elongation temperature of 72°C and a denaturing temperature of 94°C. PCR products were passed through a Centricon 100 column (Princeton Scientific, Inc.) prior to direct sequencing with the Prism FS dye-deoxy *Taq* terminator kit, and the Prism Dyeprimer FS M13 forward and reverse kits. An ABI Model 373a sequencer was employed to generate the sequence. For each specimen, at least three independent PCR fragments were sequenced.

The rod opsin cDNA sequence was obtained for one species, *Gonostoma elongatum*. mRNA was isolated from eye tissue using the QuickPrep mRNA purification kit (Pharmacia) and cDNA synthesised using Superscript II reverse transcriptase, RNase H, and oligo-dT primer. The 5' and 3' ends of the coding sequence were then amplified by the RACE system (Gibco BRL) and the resulting products sequenced as described above.

### Phylogenetic analysis

Neighbour-joining (Saitou and Nei, 1987) was used to construct a phylogenetic tree from the opsin gene sequences. The degree of support for internal branching was assessed by bootstrapping with 500 replicates. All computations were carried out with the MEGA computer package (Kumar et al., 1993).

## Results

### Fish species

Table 1 lists the 28 species of deep-sea fish examined in this study, together with the  $\lambda_{\max}$  values of their visual pigments. Three of these species, *Cataetix laticeps*, *Gonostoma elongatum* and *Hoplostethus mediteranus*, were the subject of a previous study (Hope et al., 1997). By far the largest group of species is from the Stomiiformes, reflecting their relative abundance in the area of the north eastern Atlantic where sampling took place.

### Identity of opsin gene sequence

As shown in Fig. 1, the amplified sequences form a single clade with the rod opsins of other species that is quite separate from the rod-like brain opsin identified in *Fugu* (Philp et al., 2000), the rod-like green cone opsins, and the other cone opsins, confirming therefore that it is the rod opsin gene that has been amplified. Some of the bootstrap values for branches in this tree are low, although the key branch that separates the teleost rod opsins from the remaining sequences has a

Table 1. Classification and  $\lambda_{\max}$  of visual pigments of deep-sea fish species

| Species                         | Suborder        | Family          | Subfamily       | Common name            | $\lambda_{\max}$ (nm)* |
|---------------------------------|-----------------|-----------------|-----------------|------------------------|------------------------|
| Superorder: Stenopterygii       |                 |                 |                 |                        |                        |
| Order: Stomiiformes             |                 |                 |                 |                        |                        |
| <i>Aristostomias tittmani</i>   | Photichthyoidei | Stomiidae       | Malacosteinae   | Loosejaws              | 523/551/581            |
| <i>Malacosteus niger</i>        | Photichthyoidei | Stomiidae       | Malacosteinae   | Loosejaws              | 517/542                |
| <i>Photostomias guernei</i>     | Photichthyoidei | Stomiidae       | Malacosteinae   | Loosejaws              | 483                    |
| <i>Chauliodus danae</i>         | Photichthyoidei | Stomiidae       | Stomiinae       | Scaly dragonfishes     | 484                    |
| <i>Chauliodus sloani</i>        | Photichthyoidei | Stomiidae       | Stomiinae       | Scaly dragonfishes     | 485                    |
| <i>Idiacanthus fasciola</i>     | Photichthyoidei | Stomiidae       | Idiacanthinae   | Black dragonfishes     | 485                    |
| <i>Stomias boa</i>              | Photichthyoidei | Stomiidae       | Stomiinae       | Scaly dragonfishes     | 489                    |
| <i>Ichthyocossus ovatus</i>     | Photichthyoidei | Photoichthyidae |                 | Lightfishes            | 489                    |
| <i>Vinciguerria nimbaria</i>    | Photichthyoidei | Photoichthyidae |                 | Lightfishes            | 477                    |
| <i>Argyropelecus aculeatus</i>  | Gonostomatoidei | Sternoptychidae | Sternoptychinae | Marine hatchetfishes   | 477                    |
| <i>Argyropelecus gigas</i>      | Gonostomatoidei | Sternoptychidae | Sternoptychinae | Marine hatchetfishes   | 477                    |
| <i>Gonostoma bathyphilium</i>   | Gonostomatoidei | Gonostomatidae  |                 | Bristlemouths          | 481                    |
| <i>Gonostoma elongatum</i>      | Gonostomatoidei | Gonostomatidae  |                 | Bristlemouths          | 483                    |
| Superorder: Scopelomorpha       |                 |                 |                 |                        |                        |
| Order: Myctophiformes           |                 |                 |                 |                        |                        |
| <i>Diaphus rafinesquei</i>      |                 | Myctophidae     | Lampanyctinae   | Lanternfishes          | 489                    |
| <i>Bolinichthys indicus</i>     |                 | Myctophidae     | Lampanyctinae   | Lanternfishes          | 489                    |
| <i>Ceratoscopelus warmingii</i> |                 | Myctophidae     | Lampanyctinae   | Lanternfishes          | 488                    |
| <i>Lampanyctus alatus</i>       |                 | Myctophidae     | Lampanyctinae   | Lanternfishes          | 485                    |
| <i>Benthoosema suborbitale</i>  |                 | Myctophidae     | Myctophinae     | Lanternfishes          | 487                    |
| Superorder: Paracanthopterygii  |                 |                 |                 |                        |                        |
| Order: Gadiformes               |                 |                 |                 |                        |                        |
| <i>Phycis blennoides</i>        |                 | Phycidae        | Phycine         | Phycine hakes          | 494                    |
| <i>Coryphaenoides guntheri</i>  |                 | Macrouridae     | Macrourinae     | Grenadiers or rattails | 479                    |
| Order: Ophidiiformes            |                 |                 |                 |                        |                        |
| <i>Bassozetus compresis</i>     |                 | Ophidiidae      | Ophidiinae      | Cusk-eels              | 476                    |
| <i>Cataetx laticeps</i>         |                 | Bythitidae      | Bythitinae      | Brotulas               | 468                    |
| Superorder: Protacanthopterygii |                 |                 |                 |                        |                        |
| Order: Osmeriformes             |                 |                 |                 |                        |                        |
| <i>Conocara salmonea</i>        |                 | Alepocephalidae | Alepocephalinae | Slickheads             | 480                    |
| <i>Alepocephalus bairdii</i>    |                 | Alepocephalidae | Alepocephalinae | Slickheads             | 476                    |
| Superorder: Acanthopterygii     |                 |                 |                 |                        |                        |
| Order: Beryciformes             |                 |                 |                 |                        |                        |
| <i>Anoplogaster cornuta</i>     |                 | Anoplogastridae |                 | Fangtooths             | 485                    |
| <i>Hoplostethus mediteranus</i> |                 | Trachichthyidae |                 | Slimeheads             | 479                    |
| Superorder: Cycloquamata        |                 |                 |                 |                        |                        |
| Order: Aulopiformes             |                 |                 |                 |                        |                        |
| <i>Bathysaurus ferox</i>        |                 | Synodontidae    | Harpadontinae   | Lizardfishes           | 481                    |
| <i>Bathysaurus mollis</i>       |                 | Synodontidae    | Harpadontinae   | Lizardfishes           | 479                    |

\* $\lambda_{\max}$  values were obtained from R. H. Douglas (personal communication), Douglas and Partridge, 1997; Douglas et al., 1999; Partridge, 1989; Partridge et al., 1988; Partridge et al., 1989.

significant value of 97. Additional confirmation comes from the observation that in each case, the amplified gene completely lacked introns, a feature that is limited amongst vertebrate opsins to the teleost rod opsin gene (Fitzgibbon et al., 1995; Hope et al., 1997).

#### Amino acid sequence of rod opsin

With the exception of the three species from the Gadiformes discussed below, the sequenced region of the gene included the

coding region for all seven  $\alpha$ -helical regions. The deduced amino acid sequences are shown in Fig. 2. In order to confirm that these genomic sequences correspond to the expressed sequence in the retina, the complete cDNA sequence of one species, *Gonostoma elongatum*, was determined. This sequence is also shown in Fig. 2 and is identical to that obtained previously (Hope et al., 1997) from genomic DNA.

A number of functionally important residues identified by previous studies are conserved across all species. Among these

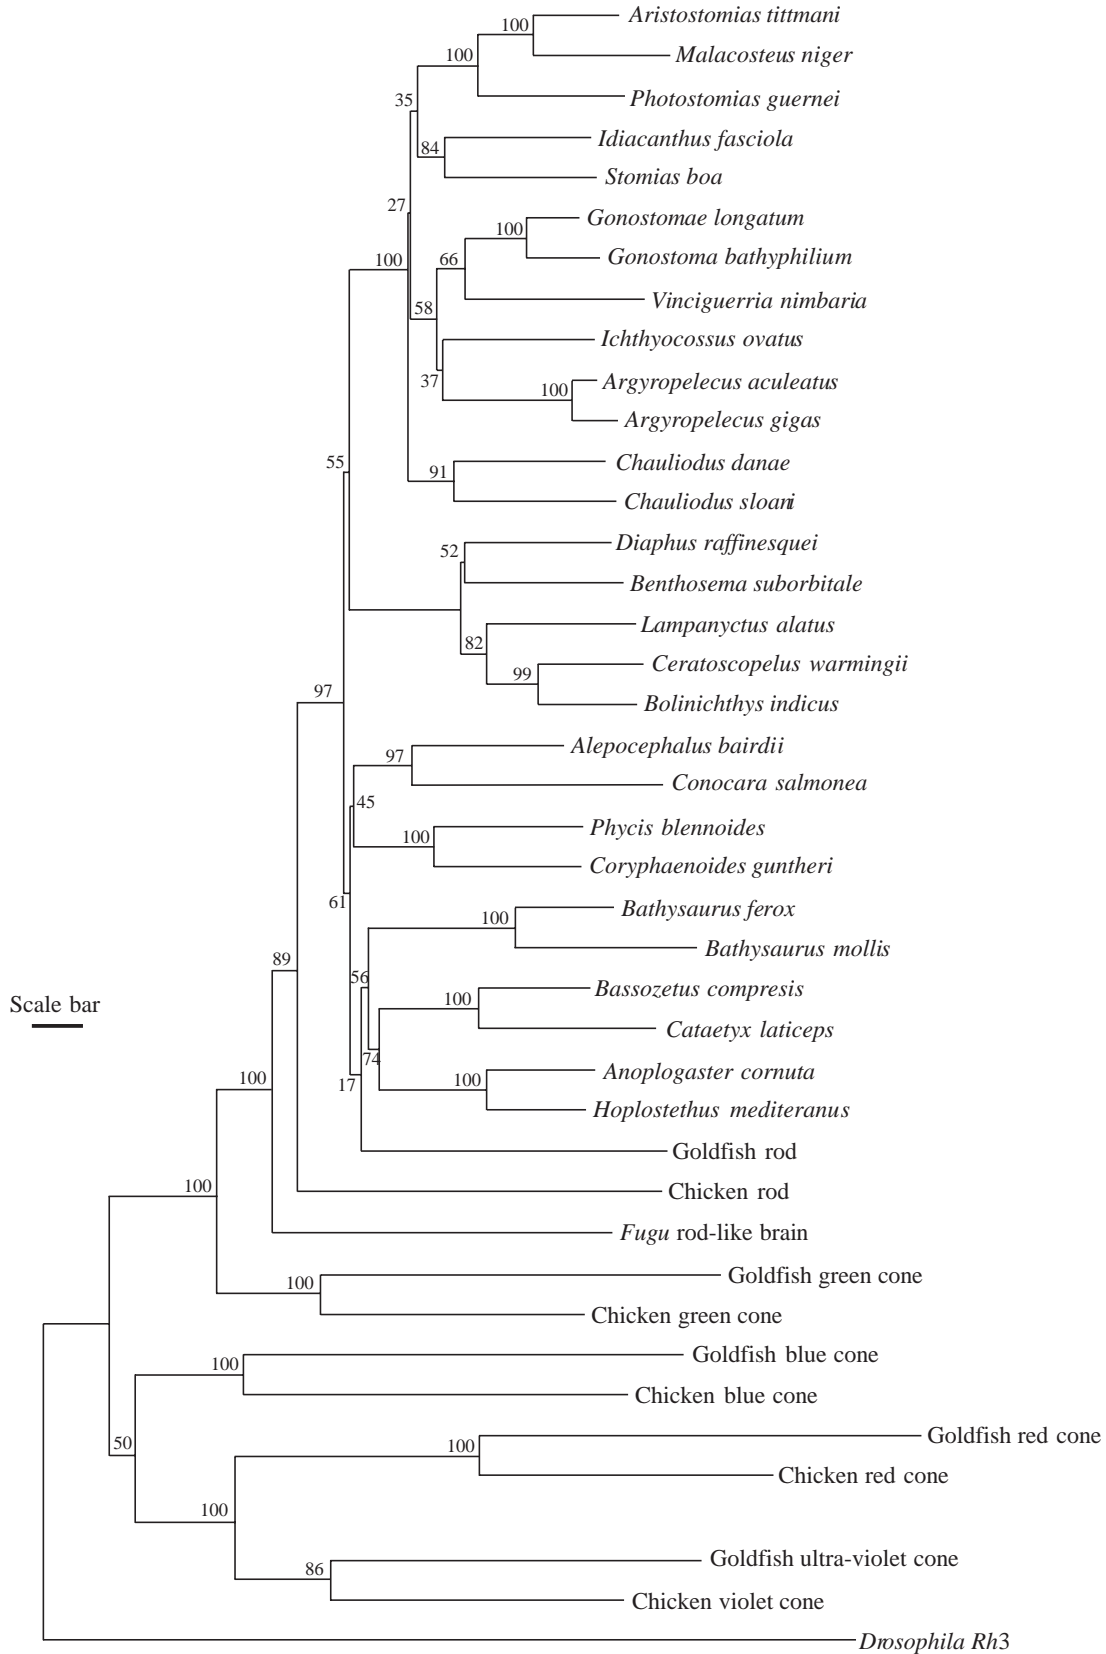

Fig. 1. Phylogenetic tree of opsin gene sequences. The tree was generated by the neighbour-joining method (Saitou and Nei, 1987). The bootstrap confidence values are shown for each branch. The scale bar is calibrated at 0.02 substitutions per site. GenBank accession numbers: *Fugu* rod-line brain AF201472, Goldfish rod L11863, blue cone L11864, green cone 111865 and red cone L11867; chicken rod D00702, violet cone M92039, blue cone M92057, green cone M92038 and red cone X57490, and *Drosophila Rh3* M17718.

are the Lys296 chromophore attachment site (Dratz and Hargrave, 1983), the Glu113 Schiff base counterion (Sakmar et al., 1989), sites of disulphide bond formation at Cys110 and Cys187 (Karnik and Khorana, 1990), and Trp126 and Trp265 (Nakayama and Khorana, 1990; Nakayama et al., 1998) involved in conformational changes during chromophore isomerisation and formation of the retinal binding pocket. A conserved tripeptide at the cytoplasmic boundary of helix 3 has been shown to be important in transducin binding (Franke et al., 1990). In mammals and birds, this tripeptide is generally Asp/Glu134, Arg135 and Tyr136. In fish, however, Trp is frequently substituted for Tyr at site 136 (Johnson et al., 1993; Hope et al., 1997) and this is seen in five of the six Orders examined here. The exception is the stomiiforms, where Tyr136 is generally present but is replaced by Phe in *Malacosteus niger* and by Trp in *Vinciguerria nimbaria*.

#### Candidate sites for spectral tuning

Except for species from the same genus, the amino acid divergence between the rod opsin sequences of these deep-sea fish species is generally >20%, reflecting the diversity of species examined in this study. In order therefore to identify candidate sites for spectral tuning, two overlapping approaches were used. The sequences were mapped on to a model based on conserved residues across >500 G-protein-linked receptor proteins (Baldwin, 1993; Baldwin et al., 1997). This model not only identifies the seven helices but, together with the three-dimensional map of frog rhodopsin determined by electron cryo-microscopy (Schertler and Hargrave, 1995), also provides a framework for orientating each helix with respect to the exterior lipid membrane and the central hydrophilic retinal-

binding pocket. Only substitutions that result in a change in either charge or polarity (Nathans, 1990; Nakayama and Khorana, 1991) in residues that are located in the transmembrane helical regions and are either adjacent to this pocket or face another helix appear to be important for the spectral tuning of the resulting pigment (Merbs and Nathans, 1993; Asenjo et al., 1994; Hope et al., 1997; Hunt et al., 1996). The number of candidate tuning sites was then extended to include additional sites identified from the crystal structure of bovine rhodopsin (Palczewski et al., 2000) that are again either adjacent to the retinal binding pocket or the Schiff base. These include part of extracellular loop 2 between helices 4 and 5 that folds deeply into the centre of the molecule, with residues 186–190 contributing to the chromophore-binding pocket. Finally, site 181 was also included, since a Glu181Gln substitution has been shown to result in a 10 nm LW-shift in bovine rhodopsin (Terakita et al., 2000). The Glu at this site is, however, totally conserved across all the deep-sea fish species.

The identity of these residues and their relative position in the helices/loop regions is shown in Table 2. The following analysis of the amino acid sequences of deep-sea fish rod opsins focuses on changes at these sites.

#### Species from the Order Stomiiformes

*Aristostomias tittmani*, *Malacosteus niger* and *Photostomias guernei* are all members of the sub-family Malacosteinae (loosejaws). They differ in that *A. tittmani* and *M. niger* are the only species amongst those studied with  $\lambda_{\max}$  values >500 nm. *M. niger* possesses a rhodopsin/porphyropsin pigment pair based on a single opsin gene (Bowmaker et al., 1988; Douglas et al., 1999). Comparing the sequence of the *M. niger* gene with

Table 2. Position in  $\alpha$ -helices of amino acid residues that line the chromophore binding pocket or are in close proximity to the chromophore

|                             | Helix 1              |     |     |     |     |     |     | Helix 2 |     |         |     |     |     |         |     |     |     |     |     |     |  |  |  |
|-----------------------------|----------------------|-----|-----|-----|-----|-----|-----|---------|-----|---------|-----|-----|-----|---------|-----|-----|-----|-----|-----|-----|--|--|--|
| Position in $\alpha$ -helix | 9                    | 10  | 13  | 14  | 17  | 20  | 24  | 5       | 6   | 9       | 12  | 13  | 16  | 20      | 24  |     |     |     |     |     |  |  |  |
| Residue                     | 43                   | 44  | 47  | 48  | 51  | 54  | 58  | 75      | 76  | 79      | 82  | 83  | 86  | 90      | 94  |     |     |     |     |     |  |  |  |
|                             | Helix 3              |     |     |     |     |     |     |         |     |         |     |     |     | Helix 4 |     |     |     |     |     |     |  |  |  |
| Position in $\alpha$ -helix | 8                    | 9   | 12  | 13  | 14  | 15  | 16  | 18      | 19  | 20      | 23  | 24  | 26  | 27      | 6   | 7   | 10  | 14  | 17  | 21  |  |  |  |
| Residue                     | 114                  | 115 | 118 | 119 | 120 | 121 | 122 | 124     | 125 | 126     | 129 | 130 | 132 | 133     | 156 | 157 | 160 | 164 | 167 | 171 |  |  |  |
|                             | Extracellular loop 2 |     |     |     |     |     |     |         |     |         |     |     |     |         |     |     |     |     |     |     |  |  |  |
| Position in loop            | 8                    | 13  | 14  | 15  | 16  | 17  |     |         |     |         |     |     |     |         |     |     |     |     |     |     |  |  |  |
| Residue                     | 181                  | 186 | 187 | 188 | 189 | 190 |     |         |     |         |     |     |     |         |     |     |     |     |     |     |  |  |  |
|                             | Helix 5              |     |     |     |     |     |     |         |     | Helix 6 |     |     |     |         |     |     |     |     |     |     |  |  |  |
| Position in $\alpha$ -helix | 8                    | 9   | 12  | 13  | 16  | 17  | 20  | 23      | 24  | 11      | 12  | 15  | 18  | 19      | 22  | 23  | 25  |     |     |     |  |  |  |
| Residue                     | 207                  | 208 | 211 | 212 | 215 | 216 | 219 | 222     | 223 | 257     | 258 | 261 | 264 | 265     | 268 | 269 | 271 |     |     |     |  |  |  |
|                             | Helix 7              |     |     |     |     |     |     |         |     |         |     |     |     |         |     |     |     |     |     |     |  |  |  |
| Position in $\alpha$ -helix | 7                    | 8   | 9   | 10  | 14  | 15  | 17  | 18      | 20  | 21      |     |     |     |         |     |     |     |     |     |     |  |  |  |
| Residue                     | 292                  | 293 | 294 | 295 | 299 | 300 | 302 | 303     | 306 | 307     |     |     |     |         |     |     |     |     |     |     |  |  |  |

The position of residues in each helix is based on the model of Baldwin (Baldwin, 1993) and the crystal structure of bovine rhodopsin (Palczewski et al., 2000).



|                         | Helix 1                   |                       |                  |                  |                |             |            |        |          |         | Helix 2  |                  |                       |          |        |        |              |             |          |        | 100         |               |         |              |
|-------------------------|---------------------------|-----------------------|------------------|------------------|----------------|-------------|------------|--------|----------|---------|----------|------------------|-----------------------|----------|--------|--------|--------------|-------------|----------|--------|-------------|---------------|---------|--------------|
| <i>A. titmani</i>       | -----                     | PDFYIPMSN             | TTGVVRS          | SPYESPQ          | YLVDPAA        | YSLLS       | SYMLFI     | IFTSP  | INFLTI   | LYVTIEH | KKLRTAL  | NY               | TLLNLAVAN             | LFIVLGGF | TTTTIY | TCMN   | 100          |             |          |        |             |               |         |              |
| <i>M. niger</i>         | -----                     | R.....                |                  |                  |                |             |            |        |          |         |          | M.F.....         |                       |          |        |        |              |             |          |        |             | V....         | K       |              |
| <i>I. ovoides</i>       | -----                     | Y...                  | L..              | M.....           | Y....          | S.V..       | FV..       | A..    | F.L.L.C. |         |          |                  |                       |          |        |        |              |             |          | M.I... | M.SS.H      |               |         |              |
| <i>S. boa</i>           | -----                     | T..V..                | K.....           | F.Y....          | E.WEF..        | AA...       | L.....     |        |          |         |          |                  |                       |          |        |        |              | V.....      | M.I...   | M.SS.S |             |               |         |              |
| <i>C. sloani</i>        | -----                     | Y.N...                | L.....           | T.R.Y....        | S.RT.LV.       | A...        | L.L...     |        |          |         |          |                  |                       |          |        |        |              | V.....      | M.I...   | L.SS.. |             |               |         |              |
| <i>I. fasciola</i>      | -----                     | Y....                 | L...M.....       | A....            | G.M.FA..       | A..         | F.L.L.C.V. |        |          |         |          |                  |                       |          |        |        |              | V.....      | M.I...   | L.SS.. |             |               |         |              |
| <i>C. danae</i>         | -----                     | Y....                 | L...L.....       | Y....            | G.V.FV..       | AA..        | F.V.C...   |        |          |         |          |                  |                       |          |        |        |              | V.....      | M.V...   | M.SS.. |             |               |         |              |
| <i>P. guernei</i>       | -----                     | L....                 | I.....Y....      | HS.V..           | FVM....        | F.L.L.C.V.  |            |        |          |         |          |                  |                       |          |        |        | M.F.....     | S...        |          |        |             |               |         |              |
| <i>G. elongatum</i>     | MNGTEG                    | F..V...               | AS.M....         | Y....            | S...FV         | AA..        | F.L.L.C.V. |        |          |         |          |                  |                       |          |        |        |              | V.....      | M.I...   | M.SS.. |             |               |         |              |
| <i>G. bathyphiliium</i> | -----                     | F..V...               | AS.I....         | Y....            | S...FV         | AA..        | F.L.L.C.V. |        |          |         |          |                  |                       |          |        |        |              | V.....      | M.I...   | M.SS.. |             |               |         |              |
| <i>V. nimbaria</i>      | -----                     | V....                 | L.....F.Y....    | A..WK..          | V.AA...        | A.....      |            |        |          |         |          |                  |                       |          |        |        | V.....       | M.I...      | M.SS..   |        |             |               |         |              |
| <i>A. aculeatus</i>     | -----                     | F....                 | A.....Y....      | N...FV..         | A..F.L.L.C.V.  |             |            |        |          |         |          |                  |                       |          |        | V..... | M.V...       | L.S.H       |          |        |             |               |         |              |
| <i>A. gigas</i>         | -----                     | F....                 | A.....Y....      | N...FV..         | A..F.L.L.C.V.  |             |            |        |          |         |          |                  |                       |          |        | V..... | M.V...       | L.S.H       |          |        |             |               |         |              |
|                         |                           |                       |                  |                  |                |             |            |        |          |         |          |                  |                       |          |        |        |              |             |          |        |             |               |         |              |
| <i>D. raffinesquei</i>  | ----                      | GDG.V...              | I....            | F.Y....          | S...AC..       | AA..        | F..LVG...  |        |          |         |          |                  |                       |          |        |        |              | P...        | GD.LM... | S.H    |             |               |         |              |
| <i>B. indicus</i>       | ----                      | GDG.V...              | I....            | Y....AN...       | AV.AA..        | F..LVG...   |            |        |          |         |          |                  |                       |          |        |        | P...         | I..GD.LM.I. | S.H      |        |             |               |         |              |
| <i>C. warmingii</i>     | ----                      | GDG.V...              | S.I....Y....     | AS...AV.AA..     | F..LVC...      |             |            |        |          |         |          |                  |                       |          |        | S..... | P..GD.LM.I.  | S.H         |          |        |             |               |         |              |
| <i>B. suborbitale</i>   | ----                      | GDG.V...              | I....            | F.Y....AN...     | AV.AA..        | F.L.LV.G... |            |        |          |         |          |                  |                       |          |        |        | P...         | GD.LM.I.    | S.H      |        |             |               |         |              |
| <i>L. alatus</i>        | ----                      | GDG.V...              | S.M....Y....     | N..P.FV..        | AA..F.L.L.C.V. |             |            |        |          |         |          |                  |                       |          |        | P...   | G.LM...      | S.H         |          |        |             |               |         |              |
|                         |                           |                       |                  |                  |                |             |            |        |          |         |          |                  |                       |          |        |        |              |             |          |        |             |               |         |              |
| <i>P. blennoides</i>    | -----                     | L.V.FV...             | M....Y....       | N...F.A.AA..     | F.L.LRG...     |             |            |        |          |         |          |                  |                       |          |        | L..... | P..D..M.I.   | M.S.H       |          |        |             |               |         |              |
| <i>C. leptolepis</i>    | -----                     | L.V.V...              | L....Y....       | T...F.A.AA..     | F.L.LRG...     |             |            |        |          |         |          |                  |                       |          |        | P...   | D..M.F...    | M.S.H       |          |        |             |               |         |              |
| <i>C. guntheri</i>      | -----                     | L.V.V...              | L....Y....       | T...F.A.AA..     | F.L.LRG...     |             |            |        |          |         |          |                  |                       |          |        | P...   | D..M.F...    | M.SS.H      |          |        |             |               |         |              |
|                         |                           |                       |                  |                  |                |             |            |        |          |         |          |                  |                       |          |        |        |              |             |          |        |             |               |         |              |
| <i>B. compresis</i>     | -----                     | L.V.D.....            | Y....N...        | F.A.AA..         | F.L.LSC.V...   |             |            |        |          |         |          |                  |                       |          |        | P...   | M.F...       | M.S.H       |          |        |             |               |         |              |
| <i>C. laticeps</i>      | -----                     | Y....N...             | AA..A..          | FLL.LL.G...      | VQ.....        |             |            |        |          |         |          |                  |                       |          |        | P...   | M.F...       | M.S.H       |          |        |             |               |         |              |
|                         |                           |                       |                  |                  |                |             |            |        |          |         |          |                  |                       |          |        |        |              |             |          |        |             |               |         |              |
| <i>C. salmonea</i>      | -----                     | I....V.....           | N..Y....         | T...F.A.AA..     | F.L.LLG.TV...  |             |            |        |          |         |          |                  |                       |          |        | P...   | E.D.M.F...   | F.SL.       |          |        |             |               |         |              |
| <i>A. bairdii</i>       | -----                     | I....V.....           | N..Y....         | T...F.A.AA..     | F.L.LLG.V...   |             |            |        |          |         |          |                  |                       |          |        | L..... | P..GD.M.F... | F.SLH       |          |        |             |               |         |              |
|                         |                           |                       |                  |                  |                |             |            |        |          |         |          |                  |                       |          |        |        |              |             |          |        |             |               |         |              |
| <i>A. cornuta</i>       | -----                     | F..V...AS.M....       | Y....S...FV      | MAA..F.L.V...VQ  |                |             |            |        |          |         |          |                  |                       |          | M.I... | M.SS.H |              |             |          |        |             |               |         |              |
| <i>H. mediteranus</i>   | -----                     | F..V...AS.M....       | Y....S...FV      | MAA..F.L.V..L.VH |                |             |            |        |          |         |          |                  |                       |          | P...   | M.F... | M.SS.H       |             |          |        |             |               |         |              |
|                         |                           |                       |                  |                  |                |             |            |        |          |         |          |                  |                       |          |        |        |              |             |          |        |             |               |         |              |
| <i>B. ferox</i>         | -----                     | Q..V.V...S.I....      | DY..F..T...FCP.. | FLL.LVG...       |                |             |            |        |          |         |          |                  |                       |          | H..... | M.F... | M.S.H        |             |          |        |             |               |         |              |
| <i>B. mollis</i>        | -----                     | Q..V.V...S.I....      | DY..F..T...FCP.. | FLL.LVG...       |                |             |            |        |          |         |          |                  |                       |          | H..... | M.V... | M.A.H        |             |          |        |             |               |         |              |
|                         |                           |                       |                  |                  |                |             |            |        |          |         |          |                  |                       |          |        |        |              |             |          |        |             |               |         |              |
|                         | Helix 3                   |                       |                  |                  |                |             |            |        |          |         | Helix 4  |                  |                       |          |        |        |              |             |          |        | 200         |               |         |              |
| <i>A. titmani</i>       | GYFVLGRLGCNLE             | GFFATTG               | GGEIAL           | WLSLVLA          | VERYLVV        | VCKPIE      | SFRFGEN    | HALMGL | ASSWIM   | MAGTCS  | VPPI     | LVGWS            | RYP                   | EGFQ     | VACGID | YYTRAE | GYN          | 200         |          |        |             |               |         |              |
| <i>M. niger</i>         | S.....                    |                       |                  |                  |                |             |            |        |          |         | I.F..... |                  |                       |          |        |        |              |             |          |        | N...T.K...  | V...F...AS... | C.....  | K...         |
| <i>I. ovoides</i>       | I.....                    |                       |                  |                  |                |             |            |        |          |         | H..V.... |                  |                       |          |        |        |              |             |          |        | I.....AN... | I...F.V.C...  | I.L.... | M.C.L.H.P.F. |
| <i>S. boa</i>           | F...V...L...G...          | I.....AN...           |                  |                  |                |             |            |        |          |         |          | I...F.V.LS...    | M.C.V...TSF..         |          |        |        |              |             |          |        |             |               |         |              |
| <i>C. sloani</i>        | F.M...V...H...G...        | I.....AN...           |                  |                  |                |             |            |        |          |         |          | I...F.V.AS...    | M.....S...            |          |        |        |              |             |          |        |             |               |         |              |
| <i>I. fasciola</i>      | F...V...H...I...          | I.....AN...           |                  |                  |                |             |            |        |          |         |          | I...F.V.S..I...  | M.C.V...F...          |          |        |        |              |             |          |        |             |               |         |              |
| <i>C. danae</i>         | F...H...I...              | I.....AN...           |                  |                  |                |             |            |        |          |         |          | I...FT.V.S.AI... | M.G...DP.F...         |          |        |        |              |             |          |        |             |               |         |              |
| <i>P. guernei</i>       | SI...L...G...             | I.....AN...           |                  |                  |                |             |            |        |          |         |          | FA.L.SS.A        | T.....                |          |        |        |              |             |          |        |             |               |         |              |
| <i>G. elongatum</i>     | I...H...I...              | I.....AN...           |                  |                  |                |             |            |        |          |         |          | I...FT.V.SS...   | M.....P...            |          |        |        |              |             |          |        |             |               |         |              |
| <i>G. bathyphiliium</i> | I...H...A...I...          | I.....AN...           |                  |                  |                |             |            |        |          |         |          | I...FT.V.C...    | I...M...V...P...      |          |        |        |              |             |          |        |             |               |         |              |
| <i>V. nimbaria</i>      | I.I...H..QV...            | I...W...DN...D...     |                  |                  |                |             |            |        |          |         |          | VFA.F.F...       | F..P.L...CS...P...    |          |        |        |              |             |          |        |             |               |         |              |
| <i>A. aculeatus</i>     | I.N.VI..C.H.Q...          | I...AN...             |                  |                  |                |             |            |        |          |         |          | I...VFA.V.T...   | F...M.C...A.F...      |          |        |        |              |             |          |        |             |               |         |              |
| <i>A. gigas</i>         | I.N.VI..C.H.Q...          | I...AN...             |                  |                  |                |             |            |        |          |         |          | I...VFA.V.V...   | F...M.C...A.F...      |          |        |        |              |             |          |        |             |               |         |              |
|                         |                           |                       |                  |                  |                |             |            |        |          |         |          |                  |                       |          |        |        |              |             |          |        |             |               |         |              |
| <i>D. raffinesquei</i>  | K...AI..WC.H.QV...        | SI..W...S...Q.S.SI... |                  |                  |                |             |            |        |          |         |          | GVT.V.TA         | M.CS...V...           |          |        |        |              |             |          |        |             |               |         |              |
| <i>B. indicus</i>       | K...I...H..Q...           | SI..W...S...Q.S.SI... |                  |                  |                |             |            |        |          |         |          | VT.V.SA          | M.CS...V...           |          |        |        |              |             |          |        |             |               |         |              |
| <i>C. warmingii</i>     | K...TI..M.H.QV...         | SI..W...S...Q.S.SI... |                  |                  |                |             |            |        |          |         |          | GV.V.ST          | M.CS...V...           |          |        |        |              |             |          |        |             |               |         |              |
| <i>B. suborbitale</i>   | K...II..M.H.QVG...        | S..W...SN...T.E.SI... |                  |                  |                |             |            |        |          |         |          | VF..A...         | V..M.CS...F...        |          |        |        |              |             |          |        |             |               |         |              |
| <i>L. alatus</i>        | KT...AI..H..QV...         | S..W...SN...Q.S.SI... |                  |                  |                |             |            |        |          |         |          | VT.V.TA          | M.CS...V...           |          |        |        |              |             |          |        |             |               |         |              |
|                         |                           |                       |                  |                  |                |             |            |        |          |         |          |                  |                       |          |        |        |              |             |          |        |             |               |         |              |
| <i>P. blennoides</i>    | T...I.Y...L...            | WI...MSN...           |                  |                  |                |             |            |        |          |         |          | I.V.FT.V..NA.AF  | EM.CS..V...P...       |          |        |        |              |             |          |        |             |               |         |              |
| <i>C. leptolepis</i>    | D...Y..L..V...            | WV...SN...            |                  |                  |                |             |            |        |          |         |          | I.VITT..NA.A     | M.CS..VE..A...        |          |        |        |              |             |          |        |             |               |         |              |
| <i>C. guntheri</i>      | D...Y..L..V...            | I.WI...SN...          |                  |                  |                |             |            |        |          |         |          | I.VITT..NA.A     | M.CS..V...A...        |          |        |        |              |             |          |        |             |               |         |              |
|                         |                           |                       |                  |                  |                |             |            |        |          |         |          |                  |                       |          |        |        |              |             |          |        |             |               |         |              |
| <i>B. compresis</i>     | I...R...L..S...           | I.W...SN...           |                  |                  |                |             |            |        |          |         |          | I.VSAT..L.A      | M.CS..V...            |          |        |        |              |             |          |        |             |               |         |              |
| <i>C. laticeps</i>      | I...L..S...I...           | I.W...SN...           |                  |                  |                |             |            |        |          |         |          | I.VSAT..L.AG     | I...I.CS..V...F..F... |          |        |        |              |             |          |        |             |               |         |              |
|                         |                           |                       |                  |                  |                |             |            |        |          |         |          |                  |                       |          |        |        |              |             |          |        |             |               |         |              |
| <i>C. salmonea</i>      | F..T.KI...L..Q...A...     | SI..WI...MSN...       |                  |                  |                |             |            |        |          |         |          | I.V.T.V..L.A     | M.CT...P.V...         |          |        |        |              |             |          |        |             |               |         |              |
| <i>A. bairdii</i>       | F..T.TI..A...F..Q.V..A... | VI..WV...MAN...       |                  |                  |                |             |            |        |          |         |          | I.V.IT.L.LA.C    | F...M.CS...V...       |          |        |        |              |             |          |        |             |               |         |              |
|                         |                           |                       |                  |                  |                |             |            |        |          |         |          |                  |                       |          |        |        |              |             |          |        |             |               |         |              |
| <i>A. cornuta</i>       | T...I.A...L...            | I.WV...SN...          |                  |                  |                |             |            |        |          |         |          | I.VSFT.L.LA.C    | F...M.CS...V...       |          |        |        |              |             |          |        |             |               |         |              |
| <i>H. mediteranus</i>   | T...I...L...A...          | I.WV...SN...T..I...   |                  |                  |                |             |            |        |          |         |          | VSLT.L.CA        | M.C...P.V...          |          |        |        |              |             |          |        |             |               |         |              |
|                         |                           |                       |                  |                  |                |             |            |        |          |         |          |                  |                       |          |        |        |              |             |          |        |             |               |         |              |
| <i>B. ferox</i>         | T...I...H...S...          | I.WV...SN...          |                  |                  |                |             |            |        |          |         |          | I.VTFT.M..SA     | M.C...P.V...          |          |        |        |              |             |          |        |             |               |         |              |
| <i>B. mollis</i>        | S...H...S...              | I.WV...SN...          |                  |                  |                |             |            |        |          |         |          | I.VTFT.M..SA     | L...M.CS...P.I...     |          |        |        |              |             |          |        |             |               |         |              |

Fig. 2

|                        | Helix 5                                        | Helix 6                                        | Helix 7         |     |
|------------------------|------------------------------------------------|------------------------------------------------|-----------------|-----|
| <i>A. tittmani</i>     | ESFVIYMFILHFIIPMIVIFFCYGRLLCAVKEAAAAQOSETTORAE | EREVTRLVIMMVVSYLVTVWPYASVAWYIFCHQGTHTFGP       | VFMVRPIFFAKSSAL | 300 |
| <i>M. niger</i>        | K..V..YSM...LCIMIIY...W..R.....                | F..VL.MF.....T...YF...SS.....GI.....           |                 |     |
| <i>I. ovatus</i>       | DT.....T...S..LFI.C.....                       | M..L.F.F.LS...F..W..TN..AD..L..AV.S.....       |                 |     |
| <i>S. boa</i>          | .....V...S..LFI.A.....                         | M..VL.C.F..L.....W..N..AE..L..TV.S.....        |                 |     |
| <i>C. sloani</i>       | .....SM..AV.LTI.S.....                         | S.M.VL...F...L..G..W..N..AE..L..AI.S.....      |                 |     |
| <i>I. fasciola</i>     | .....V...S..LFI.A.....                         | M..L.C.F.I..L..G..W..N..AE..L..TI.S.....       |                 |     |
| <i>C. danae</i>        | .....TV..ST.LSI.S.....W.....F.....             | S.M.VL.S.F.MS.L...W..TN..E..L..TV.S.....I      |                 |     |
| <i>P. guernei</i>      | .....TV..G.....M.....                          | L.F.F.L.....T.....SN..AN..I..GI.T...T...       |                 |     |
| <i>G. elongatum</i>    | .....AC..A..LVI.S.....                         | S.M.VL.C.F.IC.L..G..W..N..E..I..TA.S.....      |                 |     |
| <i>G. bathyphilium</i> | .....AV..AG.LL..A.....                         | S.M.VL...F.IC.L..G..W..N..E..I..TA.S.....      |                 |     |
| <i>V. nimbaria</i>     | .....AC..A..LVI.S.....                         | S.M.VL.C.F.IC.L..G..W..TN..E..I..TA.S.....     |                 |     |
| <i>A. aculeatus</i>    | D.Y.V...TC..CF.LL..T.....                      | M..L.M.F..S.L..T..W..N..E..L..AG.S.....        |                 |     |
| <i>A. gigas</i>        | D.Y.V...TC..CF.LL..S.....                      | M..L.M.F.C.S.C..G..W..N..E..L..AG.S.....       |                 |     |
| <i>D. raffinesquei</i> | ..Y...TC..G..CI...Q.....A.....                 | M...IAF..C.....W..NN..M.....TL.A...RA.I        |                 |     |
| <i>B. indicus</i>      | .....CC..MG.FVI...Q.F...A.....                 | M...C.AF..S.....L.G..SEL...TL.A...TA.I         |                 |     |
| <i>C. warmingii</i>    | ..V...FG..G..CI...Q.....A.....                 | M...IAF..S...T.W.L.N..GEL..L.TI.A...RA.I       |                 |     |
| <i>B. suborbitale</i>  | DT.....SC..T..LVI.Y...Q.V...A.....             | MC...GIAF..C.....IW..NN..AA...TI.A...TA.I      |                 |     |
| <i>L. alatus</i>       | ..V...TC..G.FVI...Q.....A.....                 | K...MC..GAAF.IC.C...W..N..AA..L..KL.A...A.I    |                 |     |
| <i>P. blennoides</i>   | .....I..C..ST.LV.....                          | M.VI..IGF..C.L..G.....T...SI...TL.A...AA.I     |                 |     |
| <i>C. leptolepis</i>   | .....C..S..LT.V.....                           | M.VI..IGF.IC.L..G.....T...I..L..TL.S...A.T     |                 |     |
| <i>C. guntheri</i>     | .....C..S..LT.V.....                           | S.M.VI..IGF.IC.L.....T...I..M..TL.S...A.I      |                 |     |
| <i>B. compresis</i>    | .....LC..T..LTIV.....                          | K...M..I..IAFHIC.L..G.....T...I..L..TL.S...A.T |                 |     |
| <i>C. laticeps</i>     | .....LC..T..LTIV.....                          | K...M..L..IAFHIC.L.....S.T.H.AEI..V.TL.S...I   |                 |     |
| <i>C. salmonea</i>     | ..V...VV..R..FV.....V..D..Q.....               | M.V..T.AF..C.....WL.T...ASY...SV.SL...A.I      |                 |     |
| <i>A. bairdii</i>      | .....VC..S..LT.....                            | M.VL..IAF.IC.L.....T...SE...TI.S...A.I         |                 |     |
| <i>A. cornuta</i>      | .....SSG..S...T.L.C.....D.....                 | S.M.VL..T.FFIS.L.....T...E...SL.S...S.I        |                 |     |
| <i>H. mediteranus</i>  | .....VC..S..LTI.....VLLP...S.....              | M.VL..IAF.IC.L.....T...SE...TL.S...I           |                 |     |
| <i>B. ferox</i>        | .....VC..T..LTI.....                           | M.VI..IAF..C.....T...ST..IV.TVLSC...T.         |                 |     |
| <i>B. mollis</i>       | ..V...LV..T..LSIMS...F.VI..V.....              | M.VI..IAF..C.....T...ST.S.I..TVLSC...T.        |                 |     |

|                        |                                                  |     |
|------------------------|--------------------------------------------------|-----|
| <i>A. tittmani</i>     | FNPVIYIICMN-----                                 | 353 |
| <i>M. niger</i>        | .....KQFRHCMITTLCC-----                          |     |
| <i>I. ovatus</i>       | Y.....-----                                      |     |
| <i>S. boa</i>          | Y..I...KQFRHCMITTLCCGK-----                      |     |
| <i>C. sloani</i>       | Y.....-----                                      |     |
| <i>I. fasciola</i>     | Y.....KQ-----                                    |     |
| <i>C. danae</i>        | Y..MS...K-----                                   |     |
| <i>P. guernei</i>      | .....-----                                       |     |
| <i>G. elongatum</i>    | Y..L...KQFRHCMITTLCCGKNPFEEEEGASTTASKEASSVSSSVGP |     |
| <i>G. bathyphilium</i> | Y..L...-----                                     |     |
| <i>V. nimbaria</i>     | Y..LS...K-----                                   |     |
| <i>A. aculeatus</i>    | Y..L...K-----                                    |     |
| <i>A. gigas</i>        | Y..I...-----                                     |     |
| <i>D. raffinesquei</i> | Y..L...-----                                     |     |
| <i>B. indicus</i>      | Y..L...-----                                     |     |
| <i>C. warmingii</i>    | Y..L...-----                                     |     |
| <i>B. suborbitale</i>  | Y..L...-----                                     |     |
| <i>L. alatus</i>       | Y..L...-----                                     |     |
| <i>P. blennoides</i>   | Y..M-----                                        |     |
| <i>C. leptolepis</i>   | Y..MS-----                                       |     |
| <i>C. guntheri</i>     | Y..MS-----                                       |     |
| <i>B. compresis</i>    | Y..L...L-----                                    |     |
| <i>C. laticeps</i>     | Y..M...RQFRNCMITTLCCGK-----                      |     |
| <i>C. salmonea</i>     | Y..I...L.KQFRHCM-----                            |     |
| <i>A. bairdii</i>      | Y..I...L-----                                    |     |
| <i>A. cornuta</i>      | Y..M-----                                        |     |
| <i>H. mediteranus</i>  | Y..M...KQFRNCMITTLCCGK-----                      |     |
| <i>B. ferox</i>        | Y..L...KQFRHC-----                               |     |
| <i>B. mollis</i>       | Y..L...F..RQFRNCM-----                           |     |

Fig. 2. Deduced amino acid sequences of deep-sea fish. The seven  $\alpha$ -helical regions as determined from the crystal structure of bovine rhodopsin (Palczewski et al., 2000) are boxed. Identical residues are indicated by a dot, missing data by a dash.

that of *P. guernei* (pigment  $\lambda_{\max}$  of 483 nm), three substitutions at potential tuning sites are apparent: Phe208Tyr in helix 5, Phe261Tyr in helix 6, and Ser292Ile in helix 7. Of these, only the latter two sites have been previously implicated in the tuning of natural pigments. The equivalent of Phe261Tyr is responsible for 6–10 nm of the shift between the primate red and green cone pigments (Asenjo et al., 1994) and Phe261Tyr generated by site-directed mutagenesis resulted in a LW shift of  $\lambda$  nm in the rod pigment of the cave fish, *Astyanax fasciatus* (Yokoyama et al., 1995). Ser292Ala resulted in a shift of 10 nm and 12 nm, respectively, in the rod opsins of bovine (Sun et al., 1997) and the dolphin (Fasick and Robinson, 1998). Both sites have been implicated in the tuning of rod opsins in Baikal cottoids (Hunt et al., 1996).

In contrast to *M. niger*, *A. tittmani* probably possesses two opsin genes. Phylogenetic analysis indicates that the sequence we have obtained is the rod opsin orthologue (see Fig. 1), and a comparison of the deduced amino acid sequence with that of *M. niger* suggests that it would generate a pigment with  $\lambda_{\max}$  of not more than 520 nm. The key features are the presence of Tyr261 and Ile292 in both species and the absence of any other modifications such as a chloride-ion binding site (Wang et al., 1993) that would indicate a LW shift to 581 nm. It also lacks Phe208Tyr, identified above as a potential candidate for the LW shift of the *M. niger* pigment, indicating that substitutions at 261 and 292 may together be sufficient to shift the  $\lambda_{\max}$  of the pigment in both species to approx. 520 nm, with the substitution at 208 responsible for the 5 nm SW shift of the *M. niger* pigment compared with the *A. tittmani* pigment.

Eight of the stomiiforms, including *P. guernei*, fall into a group with  $\lambda_{\max}$  values ranging from 489 nm to 481 nm. Potential tuning substitutions amongst this group are present at sites 51, 160, 186 and 294, but there is no consistent pattern of substitution that would account for the spectral shifts; it is unlikely therefore that any of these substitutions have an effect on spectral tuning. In contrast, species with  $\lambda_{\max}$  values <480 nm all possess Glu122Gln. This substitution in bovine and human rod opsins is known to result in a 15–20 nm shortwave shift (Sakmar et al., 1989; Nakayama and Khorana, 1990; Imai et al., 1997), sufficient therefore to account for the shift from 489 nm to 477 nm present in the two *Argyropsalecus* sp. and in *Vinciguerria nimbaria*. The latter species differs from the former two at two other sites, 51 and 264, although the identical  $\lambda_{\max}$  values of these three species would seem to rule out a role for the substitutions at these sites.

How do these amino acid substitutions fit in with the classification of the Stomiiformes? For the loosejaws *A. tittmani*, *M. niger* and *P. guernei*, the most parsimonious sequence of events is that the Phe261Tyr and Ser292Ile substitutions in the LW-shifted pigments of *A. tittmani* and *M. niger* occurred after the separation of the lineage leading to *P. guernei*, and this is supported by the phylogenetic analysis shown in Fig. 1. The acquisition of the Glu122Gln substitution is a little more complicated. It is present in *A. aculeatus* and *A. gigas* from the family Sternoptychidae, but in only one of the two members of the family Photoichthyidae (*V. nimbaria*).

All three species have a  $\lambda_{\max}$  at 477 nm. This tuning substitution therefore either occurred separately in the two families, or was lost in the other member of the Photoichthyidae. Phylogenetic analysis of the pattern of substitutions supports the former explanation (Fig. 1).

#### *Species from the Order Myctophiformes*

The five myctophid species examined have similar  $\lambda_{\max}$  values to the mid-range stomiiforms, that is the group with  $\lambda_{\max}$  values of 489–481 nm. They differ from this group, however, at three potential tuning sites, possessing Gln rather than Glu at 122, Ser rather than Ala at 132, and Ala rather than Ser at 292. The substitutions at sites 122 and 292 would be expected to have opposite tuning effects and would account therefore for the positioning of the  $\lambda_{\max}$  values of these species in the mid-range. The effect if any of Ser132 is difficult to gauge. *Lampanyctus alatus* differs from the other four myctophid species at site 83; this substitution may account therefore for the small SW shift of *L. alatus* compared to the other myctophid species. There are also differences at site 51 and 264 but, as found for the stomiiforms, these substitutions are found in species with very similar or identical  $\lambda_{\max}$  values and are unlikely to be involved in tuning.

#### *Species from the Order Gadiformes*

The gadiforms are represented by two species, *Phycis blennoides* and *Coryphaenoides guntheri*. Unfortunately, it proved impossible to extend the 3' end of the rod opsin sequences in these species up to the end of the transmembrane region of helix 7. The sequence of this region therefore falls short of two candidate sites, 306 and 307 (Fig. 2). These sites are completely invariant, however, in all other species and unlikely therefore to be involved in tuning.

The  $\lambda_{\max}$  values for *C. guntheri* is SW-shifted by 15 nm compared to that of *P. blennoides*. These rod opsin gene sequences differ at three candidate tuning sites, 122 where *C. guntheri* uniquely possesses Val, 207 where Met in *C. guntheri* is replaced by Ile in *P. blennoides*, and 292 where Ser in *C. guntheri* is replaced by Ala in *P. blennoides*. This latter substitution is capable of generating a 15 nm shift by itself and may account therefore for the spectral location of the *P. blennoides* pigment at 494 nm. In support of this, a Glu122Ile substitution generated in chicken rod opsin was without effect on spectral tuning (Imai et al., 1997), so it is probable that the similar Glu122Val substitution is also without effect. The effect of the Met207Ile substitution remains uncertain. Finally, the rod opsins of gadiforms differ from those of the stomiiforms in possessing Asp rather than Asn at site 83. In this regard, they are similar to the majority of the myctophids.

#### *Species from the Order Ophidiiformes*

The two ophidiiforms are *Bassozetus compressis* and *Cataetys laticeps*; the rod opsin gene sequence for the latter species was originally reported by Hope et al. (Hope et al., 1997). Both species have SW-shifted  $\lambda_{\max}$  values at 476 nm



and 468 nm, respectively. In fact, *C. laticeps* has the shortest  $\lambda_{max}$  of any species examined in this study. Both species possess Ser292, which would account for much of the SW shift, and they also possess Ser124. The additional SW shift of  $\lambda_{nm}$  in *C. laticeps* pigment may be accounted for by the Thr300Ile substitution.

*Species from the Order Osmeriformes*

The  $\lambda_{max}$  values of the rod pigment in the two osmeriform species, *Conocara salmonea* and *Alepocephalus bairdii*, are 480 nm and 476 nm respectively. Both possess Ser292, which would account for the SW shift of both pigments. They differ at two potential tuning sites, 132 and 168. Site 168 is, however, without effect when substituted in bovine rod opsin (Phyllis Robinson, personal communication); the 4 nm SW shift in the rod opsin of *A. bairdii* is probably therefore the result of the replacement of polar Ser132 by Val.

*Species from the Order Beryciformes*

The rod visual pigments in two species of beryciforms, *Anoplogaster cornuta* and *Hoplostethus mediteranus*, have  $\lambda_{max}$  values of 485 nm and 479 nm, respectively. The latter species was first studied by Hope et al. (Hope et al., 1997). Ser292 is again present in both species but they differ at site 299, where polar Ser rather than Ala is present in the opsin of *A. cornuta* with the slightly longer  $\lambda_{max}$ .

*Species from the Order Aulopiformes*

The aulopiforms are represented by two species from the same genus, *Bathysaurus ferox* and *B. mollis*, with similar  $\lambda_{max}$  values of 481 nm and 479 nm, respectively. Both species again possess Ser124 and Ser292, plus Thr rather than Ala at 299.

*Evolution of rod opsins*

Overall, therefore, substitutions at only nine sites effectively

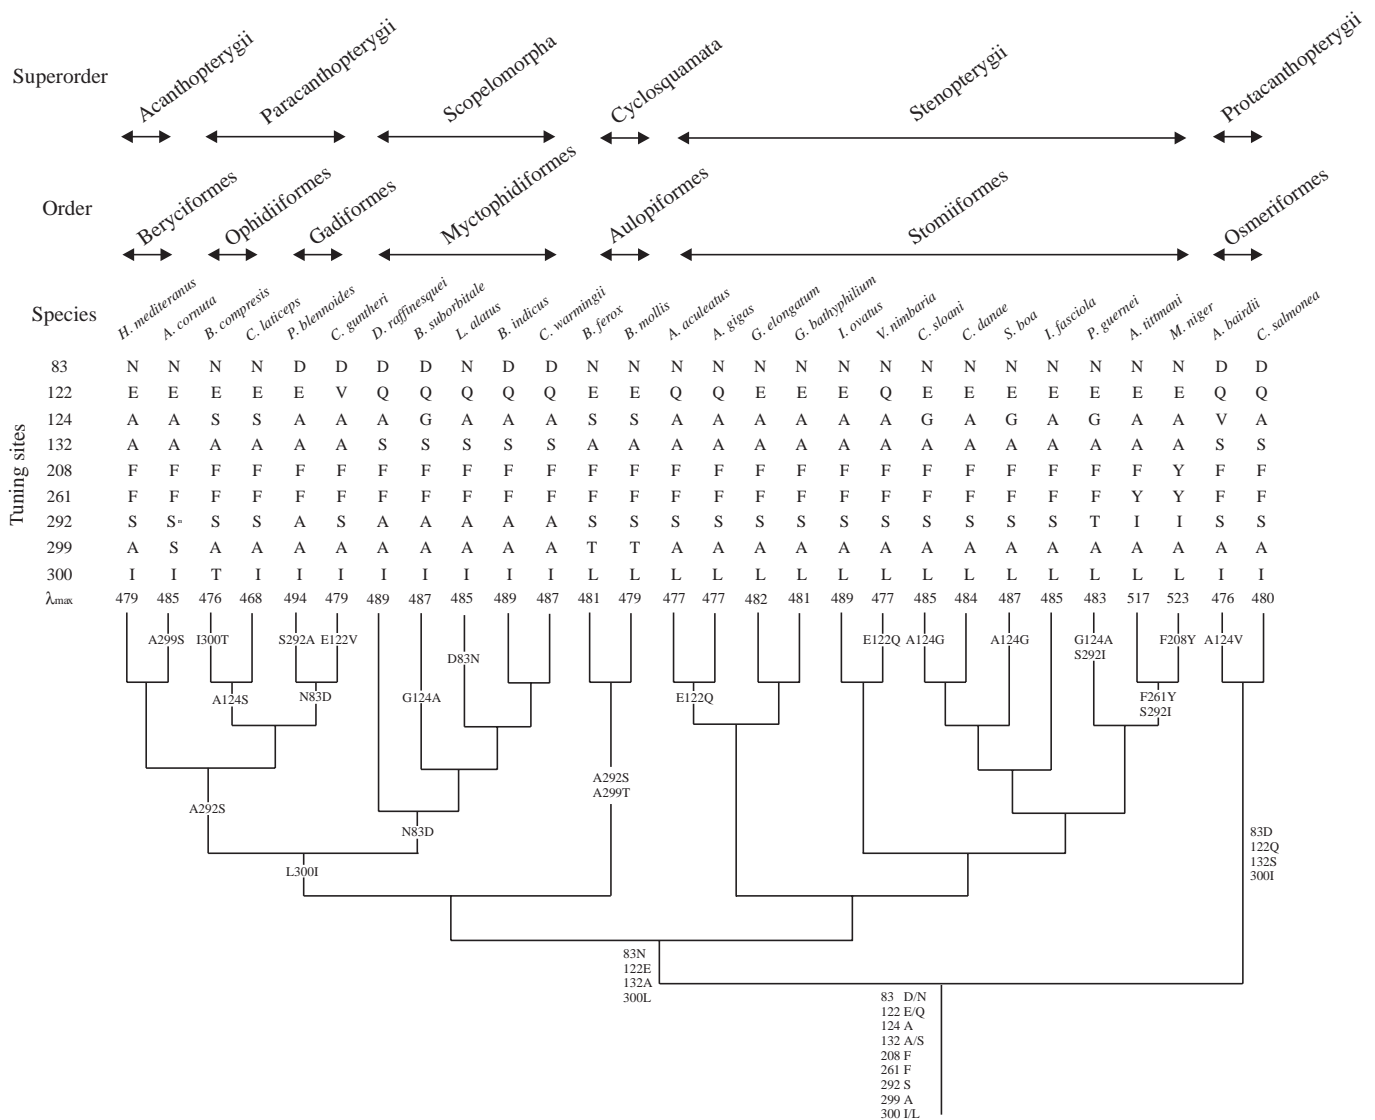

Fig. 3. Phylogeny of deep-sea fish species. The amino acid residues at each of the nine candidate tuning sites are identified and the deduced position within the tree of each substitution is shown.

account for the spectral differences seen in the different species, although the involvement of other sites with small effects cannot be discounted and the mechanism of tuning between 489 nm and 480 nm in the stomiiforms remains to be established. These nine sites are shown in Fig. 3, where they have been placed on to a phylogeny based on a classical cladistic analysis (Nelson, 1995). Of the Superorders examined in this study, the most basal is the Protoacanthopterygii, followed by the Stenopterygii, Cyclosumata, Scopelomorpha, Paracanthopterygii and Acanthopterygii. The species have been grouped according to family or sub-family divisions as appropriate (Table 1). Where more than two members of a sub-family are present, they have been grouped according to the neighbour-joining (Saitou and Nei, 1987) analysis of the nucleotide sequence of the rod opsin gene presented in Fig. 1.

This phylogenetic analysis allows certain predictions to be made about the amino acid composition of rod opsin in the ancestral species. For five sites, Ala124, Phe208, Phe261, Ser292 and Ala299, an unequivocal assignment can be made, as shown in Fig. 3, whereas for each of the remaining four sites, it is not possible to distinguish between the two alternative residues since the immediate descendants differ at each site. In total, 27 changes are required to generate the pattern of substitutions seen in these species, with many sites undergoing forward and reverse changes on a number of different occasions.

### Discussion

The visual systems of deep-sea fish are adapted to the perception of down-welling day light that is spectrally filtered to a narrow band of radiation of between 470 and 480 nm (Kirk, 1983), and to bioluminescent light, which generally peaks around 475 nm (Herring, 1983; Widder et al., 1983; Douglas et al., 1998b). Of the 28 species examined here, all but one express a single rod opsin in the retina, and the amplification of only a single rod opsin gene in each species is consistent with this observation. The exception is the stomiid *A. tittmani*, where at least two retinal visual pigments based on different opsins have been identified spectrophotometrically with  $\lambda_{\max}$  values at 523 nm and 581 nm for the A1-based pigments (Partridge and Douglas, 1995). Here again, the sequence that was amplified in this species is clearly also from a rod opsin gene which, on the basis of sequence identity with its most closely related species *M. niger*, would most probably encode the more SW-sensitive pigment.

Candidate spectral tuning sites have been identified by mapping the amino acid sequence of each fish rod opsin onto a three-dimensional model (Baldwin, 1993; Schertler and Hargrave, 1995; Baldwin et al., 1997). Potential tuning sites are identified as those that either point into the chromophore-binding pocket or face other helices. This set of sites was then extended to include all sites shown by Palczewski et al. (Palczewski et al., 2000) to be in close proximity to the chromophore or Schiff base. The stomiiforms form the largest group studied, comprising 13 species with  $\lambda_{\max}$  values for their rod opsins that range from 522 nm to 477 nm. Two substitutions, Phe261Tyr and Ser292Ile,

appear largely responsible for the shift from the more typical  $\lambda_{\max}$  values of between 489 nm and 483 nm to the longer wavelengths of *A. tittmani* and *M. niger* at around 520 nm. The additional shift to below 480 nm can be accounted for by the replacement of charged Glu by uncharged Gln at site 122. What remains unclear from this data set is the mechanism of the smaller shifts in the 489–481 nm region.

When the rod opsin sequences of the fish from the other six Orders of Euteleostei are included alongside the stomiiforms, a further six candidate tuning sites can be identified, making a total of nine sites (Fig. 3). Of these however, only four at residues 83, 122, 124 and 292 are commonly substituted in the different species. Asp83Asn was originally proposed by Hope et al. (Hope et al., 1997) to be one of the main substitutions for the tuning of the rod opsins of deep-sea fish to  $\lambda_{\max}$  values of <490 nm, and site 292, which is commonly occupied by polar Ser or Thr, is responsible in most species for a substantial part of the SW shift. The major exception is in the myctophids, where Ala292 is present; in this group, the SW shift is achieved instead by polar Gln122. The SW-shifted pigments of stomiiforms and osmeriforms, with  $\lambda_{\max}$  values of 480 nm and below, possess both Gln122 and Ser292. In contrast, similar SW shifts seen in the aulopiforms are achieved by Ser124, rather than Gln122, paired with Ser292.

Dartnall and Lythgoe (Dartnall and Lythgoe, 1965) and Bridges (Bridges, 1965) were the first to note that the  $\lambda_{\max}$  values of vertebrate visual pigments cluster around certain points in the spectrum. This is particularly apparent in primate M and L cone pigments, with each spectral location attributable to a particular combination of amino acid residues at three main sites (Neitz et al., 1991; Williams et al., 1992; Hunt et al., 1998; Dulai et al., 1999). The same phenomenon is seen in the rod pigments of deep-sea fish (Partridge et al., 1989; Partridge et al., 1992) and a similar explanation has been advanced, namely that the spectral location of pigments belonging to the same cluster group arises from a common set of amino acid substitutions (Douglas et al., 1998b). The pattern of substitutions across the 28 species included in this study indicates, however, that for the four most commonly used sites, this is only true for species from the same Order. In general, therefore, the presence of cluster points in deep-sea fish rod opsins cannot be attributed to the selection of a particular set of amino acid substitutions. Rather, it is achieved by different combinations of amino acids at these sites that produce the same net spectral shift. This is summarised in Table 3, where representative species from different Orders with the same or very similar  $\lambda_{\max}$  values are listed. For each cluster group, there are at least two different combinations of residues at the four sites.

The phylogenetic distribution of amino acid substitutions indicates that the rod opsin of the ancestral species would have possessed Ser292 and that the resulting pigment would have been SW-shifted to around 485 nm or 480 nm, depending on whether Glu or Gln was present at site 122. This implies that species with SW-shifted rod visual pigments were present at or near the base of the Euteleost lineage, adapted therefore to the same visual environment as present-day deep-sea fish.

Table 3. Amino acid residues at four sites in species from different Orders but with pigments that spectrally locate at three cluster points

| Cluster point | $\lambda_{\max}$ (nm) | Amino acid sites |     |     |     |     |
|---------------|-----------------------|------------------|-----|-----|-----|-----|
|               |                       | 83               | 122 | 124 | 292 |     |
| 1             | Stomiiformes          | 489              | Asn | Glu | Ala | Ser |
|               | Myctophiformes        | 489              | Asp | Gln | Ala | Ala |
| 2             | Stomiiformes          | 482              | Asn | Glu | Ala | Ser |
|               | Gadiformes            | 482              | Asp | Val | Ala | Ser |
|               | Aulopiformes          | 481              | Asn | Glu | Ser | Ser |
| 3             | Stomiiformes          | 477              | Asn | Gln | Ala | Ser |
|               | Osmeriformes          | 477              | Asn | Glu | Ala | Ser |
|               | Ophidiiformes         | 476              | Asn | Glu | Ser | Ser |

The  $\lambda_{\max}$  of a visual pigment depends on at least two factors. Firstly, the strength of the electrostatic interaction between the Glu113 counterion and the protonated Schiff base is critical; substitutions that increase the strength of this interaction and thereby stabilise the ground state will result in a SW shift, whereas those that reduce it will produce a LW shift (Blatz et al., 1971; Kakitani et al., 1985). Secondly, photoexcitation of the chromophore induces a significant increase in  $\pi$  electron delocalization and a corresponding change in dipole moment, with a shift of net positive charge towards the  $\beta$ -ionone ring upon excitation (Kropf and Hubbard, 1958; Mathies and Stryer, 1976). Interactions with charged, polar or polarizable residues that alter delocalization will lead to a change in the energy difference between ground and excited states. An increase in delocalization will result in a LW shift in the absorbance spectrum, and a decrease in a SW shift. Sites 83, 292, 299 and 300 cluster around the protonated Schiff base and negative counterion. Asp83 in bovine rhodopsin, although not directly involved in interactions with the Schiff base, is important in constraining the position of helices 2, 3 and 4 *via* links with other residues (Palczewski et al., 2000). The Asp83Asn substitution in deep sea fish involves a charge change and may have a consequential effect, therefore, on helix positioning in relation to the chromophore, thereby resulting in a stabilisation of the Schiff base counterion. Ala299 is also involved in an inter-helical constraint to the kinked region of helix 6 that may be disrupted on photoactivation (Palczewski et al., 2000). The other two substitutions (Ser292Ala, Ile/Leu300Thr) will both result in a change in the polar environment of the Schiff base. Sites 122, 124, 132 and 261 are all close to the polyene chain of retinal. The residue at site 122 is involved in the interaction between helix 3 and the  $\beta$ -ionone ring of retinal and is one of only three sites that form the cytoplasmic aspect of the retinal binding pocket (Palczewski et al., 2000). The other two are 261 and 265. Substitutions at site 261 are known to cause spectral shifts in primate red and green pigments (Merbs and Nathans, 1993; Asenjo et al., 1994) and are implicated in this study, whereas Trp265 is totally conserved across all deep-sea fish species. Finally, site 208 is in helix 5, in a position to interact *via*

a change in polar group with the  $\beta$ -ionone ring of the chromophore.

The residue at site 122 is known to be important in determining the rate metarhodopsin II decay; in site-directed mutagenesis of chicken rod opsin, Glu122Gln or Glu122Ile produced pigments that decay at a significantly faster rate than wild type (Imai et al., 1997). If this feature extends to deep-sea fish, in addition to its effect on spectral tuning, the Glu122Gln substitution present in the three most SW-shifted stomiiform species, in all five species of myctophids, and in two species of osmeriforms, will also result in a more rapid decay of metarhodopsin II and thereby reduce the amplification of the phototransduction cascade. The Glu122Val substitution present in gadiforms, although lacking an effect on  $\lambda_{\max}$ , may also have this effect on phototransduction.

A number of the sites identified in this study have been shown to be involved in the tuning of visual pigments in other species. In particular, substitutions at site 261 play a major role in the tuning of primate MW and LW pigments (Neitz et al., 1991; Williams et al., 1992; Merbs and Nathans, 1992; Asenjo et al., 1994), and substitutions at sites 83 and 292 have been implicated in the SW shifts of rod pigments in different species of cottoid fish in Lake Baikal (Hunt et al., 1996), in bovine (Sun et al., 1997) and in the dolphin (Fasick et al., 1998). Such substitutions are clearly separate events and are examples therefore of convergent evolution, a common feature of opsin gene evolution (Hunt et al., 1998), which must reflect the relatively limited number of sites that can change to give the required spectral shift and still result in a fully functional pigment. Convergent evolution must also be the explanation for the occurrence of repeat substitutions at certain of the key sites identified in the deep-sea rod opsins examined in this study.

We thank the Masters, officers and crew of RRS Challenger and R/V Edwin Link, Professor I. G. Priede for his invitation to join cruise 113, and Drs E. Widder and T. Frank for their invitation to join Harbor Branch cruises on the R/V Edwin Link. The work was supported by project and sea-time grants from the Natural Environment Research Council.

## References

- Ali, M. A. and Anctil, M. (1976). *Retinas of Fishes: An Atlas*. Berlin: Springer-Verlag.
- Asenjo, A. B., Rim, J. and Oprian, D. D. (1994). Molecular determinants of human red/green color discrimination. *Neuron* **12**, 1131–1138.
- Baldwin, J. M. (1993). The probable arrangement of the helices in G protein-coupled receptors. *EMBO J.* **12**, 1693–1703.
- Baldwin, J. M., Schertler, G. F. X. and Unger, V. M. (1997). An alpha-carbon template for the transmembrane helices in the rhodopsin family of G-protein-coupled receptors. *J. Mol. Biol.* **272**, 144–164.
- Blatz, P. E., Baumgartner, N., Balasubramanian, V., Balasubramanian, P. and Stedman, E. (1971). Wavelength regulation in visual pigment chromophore. Large induced bathochromic shifts in retinol and related polyenes. *Photochem. Photobiol.* **14**, 531–549.
- Bowmaker, J. K., Dartnall, H. J. A. and Herring, P. J. (1988). Longwave-sensitive visual pigments in some deep-sea fishes: segregation of 'paired' rhodopsins and porphyropsins. *J. Comp. Physiol. A* **163**, 685–698.
- Bridges, C. D. B. (1965). The grouping of visual pigments about preferred positions in the spectrum. *Vision Res.* **5**, 223–238.



- Dartnall, H. J. A. and Lythgoe, J. N. (1965). The spectral clustering of visual pigments. *Vision Res.* **5**, 81–100.
- Denton, E. J. and Warren, F. J. (1957). The photosensitive pigments in the retinae of deep sea fish. *J. Mar. Biol. Assn. UK* **36**, 651–662.
- Denton, E. J. (1990). Light and vision at depths greater than 200 m. In *Light and Life in the Sea* (ed. P. J. Herring, A. K. Campbell, M. Whitfield and L. Maddock), pp. 127–148. Cambridge: Cambridge University Press.
- Douglas, R. H. and Partridge, J. C. (1997). On the visual pigments of deep-sea fish. *J. Fish Biol.* **50**, 68–85.
- Douglas, R. H., Partridge, J. C. and Hope, A. J. (1995). Visual and lenticular pigments in the eyes of demersal deep-sea fishes. *J. Comp. Physiol. A* **177**, 111–122.
- Douglas, R. H., Partridge, J. C., Dulai, K. S., Hunt, D. M., Mullineaux, C. W. and Hynninen, P. H. (1999). Enhanced retinal longwave sensitivity using a chlorophyll-derived photosensitizer in *Malacosteus niger*, a deep-sea dragon fish with far-red bioluminescence. *Vision Res.* **39**, 2817–2832.
- Douglas, R. H., Partridge, J. C., Dulai, K. S., Hunt, D. M., Mullineaux, C., Tauber, A. Y. and Hynninen, P. H. (1998a). Dragon fish see using chlorophyll. *Nature* **393**, 423–424.
- Douglas, R. H., Partridge, J. C. and Marshall, N. J. (1998b). The eyes of deep-sea fish I. Lens pigmentation, tapeta and visual pigments. *Prog. Ret. Eye Res.* **17**, 597–636.
- Dratz, E. A. and Hargrave, P. A. (1983). The structure of rhodopsin and the outer segment disc membrane. *Trends Biochem. Sci.* **8**, 128–131.
- Dulai, K. S., von Dornum, M., Mollon, J. D. and Hunt, D. M. (1999). The evolution of trichromatic colour vision by opsin gene duplication in New World and Old World primates. *Genome Res.* **9**, 629–638.
- Fasick, J. I. and Robinson, P. R. (1998). Mechanism of spectral tuning in the dolphin visual pigments. *Biochemistry* **37**, 433–438.
- Findlay, J. B. and Pappin, D. J. (1986). The opsin family of proteins. *Biochem. J.* **238**, 625–642.
- Fitzgibbon, J., Hope, A. J., Slobodyanyuk, S. J., Bellingham, J., Bowmaker, J. K. and Hunt, D. M. (1995). The rhodopsin-encoding gene of bony fish lacks introns. *Gene* **164**, 273–277.
- Franke, R. R., König, B., Sakmar, T. P., Khorana, H. G. and Hofmann, K. P. (1990). Rhodopsin mutants that bind but fail to activate transducin. *Science* **250**, 123–125.
- Fröhlich, E., Negishi, K. and Wagner, H.-J. (1995). The occurrence of dopaminergic interplexiform cells correlate with the presence of cones in the retinae of fish. *Visual Neurosci.* **12**, 359–369.
- Herring, P. J. (1983). The spectral characteristics of luminous marine organisms. *Proc. Roy. Soc. Lond. B* **220**, 183–217.
- Hope, A. J., Partridge, J. C., Dulai, K. S. and Hunt, D. M. (1997). Mechanisms of wavelength tuning in the rod opsins of deep-sea fishes. *Proc. Roy. Soc. Lond. B* **264**, 155–163.
- Hunt, D. M., Dulai, K. S., Cowing, J. A., Julliot, C., Mollon, J. D., Bowmaker, J. K., Li, W.-H. and Hewett-Emmett, D. (1998). Molecular evolution of trichromy in primates. *Vision Res.* **38**, 3299–3306.
- Hunt, D. M., Fitzgibbon, J., Slobodyanyuk, S. J. and Bowmaker, J. K. (1996). Spectral tuning and molecular evolution of rod visual pigments in the species flock of Cottoid fish in Lake Baikal. *Vision Res.* **36**, 1217–1224.
- Imai, H., Kojima, D., Oura, T., Tachibanaki, S., Terakita, A. and Shichida, Y. (1997). Single amino acid residue as a functional determinant of rod and cone visual pigments. *Proc. Natl. Acad. Sci. USA* **94**, 2322–2326.
- Johnson, R. L., Grant, K. B., Zankel, T. C., Boehm, M. F., Merbs, S. L., Nathans, J. and Nakanishi, K. (1993). Cloning and expression of goldfish opsin sequences. *Biochemistry* **32**, 208–214.
- Kakitani, H., Kakitani, T., Rodman, H. and Honig, B. (1985). On the mechanism of wavelength regulation in visual pigments. *Photochem. Photobiol.* **41**, 471–479.
- Karnik, S. S. and Khorana, G. H. (1990). Assembly of functional rhodopsin requires a disulfide bond between cysteine residues 110 and 187. *J. Biol. Chem.* **265**, 17520–17524.
- Kirk, J. T. O. (1983). *Light and Photosynthesis in Aquatic Eco-systems*. Cambridge: Cambridge University Press.
- Kropf, A. and Hubbard, R. (1958). The mechanism of bleaching rhodopsin. *Ann. NY Acad. Sci.* **74**, 266–280.
- Kumar, S., Tamura, K. and Nei, M. (1993). *MEGA: Molecular Evolutionary Genetics Analysis*, version 1.01. Pennsylvania: Pennsylvania State University.
- Marshall, N. B. (1979). *Developments in Deep Sea Biology*. Dorset: Blandford.
- Mathies, R. and Stryer, L. (1976). Retinal has a highly dipolar vertically excited singlet state: implications for vision. *Proc. Natl. Acad. Sci. USA* **7**, 2169–2173.
- Merrett, N. R. and Marshall, N. B. (1981). Observations on the ecology of deep-sea bottom-living fishes collected off northwest Africa (08°–27° N). *Prog. Oceanog.* **9**, 185–244.
- Merbs, S. L. and Nathans, J. (1993). Role of hydroxyl-bearing amino acids in differentially tuning the absorption spectra of the human red and green cone pigments. *Photochem. Photobiol.* **58**, 706–710.
- Munk, O. (1966). Ocular anatomy of some deep-sea teleosts. In *Dana report No. 70*, pp. 1–62. Copenhagen: Clarksburg Foundation.
- Munz, F. W. (1958). Photosensitive pigments from the retinae of certain deep-sea fishes. *J. Physiol.* **140**, 220–235.
- Nakayama, T. A. and Khorana, H. G. (1990). Orientation of retinal in bovine rhodopsin determined by cross-linking using a photoactivatable analog of 11-cis-retinal. *J. Biol. Chem.* **265**, 15762–15769.
- Nakayama, T. A. and Khorana, H. G. (1991). Mapping of the amino acids in membrane-embedded helices that interact with the retinal chromophore in the bovine rhodopsin. *J. Biol. Chem.* **266**, 4269–4275.
- Nakayama, T. A., Zhang, W., Cowan, A. and Kung, M. (1998). Mutagenesis studies of human red opsin: trp-281 is essential for proper folding and protein-retinal interactions. *Biochemistry* **37**, 17487–17494.
- Nathans, J. (1990). Determinants of visual pigment absorbance: role of charged amino acids in the putative transmembrane segments. *Biochemistry* **29**, 937–942.
- Neitz, M., Neitz, J. and Jacobs, G. H. (1991). Spectral tuning of pigments underlying red-green color vision. *Science* **252**, 971–974.
- Nelson, J. S. (1995). *Fishes of the World*. Third Edition. New York: John Wiley.
- Nicol, J. A. C. (1969). Bioluminescence. In *Fish Physiology* (ed. W. S. Hoar and D. J. Randall), pp. 355–400, Vol. III. Academic Press, New York.
- Palczewski, K., Kumasaka, T., Hori, T., Behnke, C. A., Motoshima, H., Fox, B. A., Le Trong, L., Teller, D. C., Okada, T., Stenkamp, R. E., Yamamoto, M. and Miyano, M. (2000). Crystal structure of rhodopsin: A G protein-coupled receptor. *Science* **289**, 739–745.
- Partridge, J. C. (1989). The visual pigments of deep-sea fishes: Ecophysiology and molecular biology. *Prog. Underwater Sci.* **14**, 17–31.
- Partridge, J. C., Archer, S. N. and Lythgoe, J. N. (1988). Visual pigments in the individual rods of deep-sea fishes. *J. Comp. Physiol. A* **162**, 543–550.
- Partridge, J. C. and Douglas, R. H. (1995). Far-red sensitivity in the deep-sea dragon fish *Aristostomias titmanni*. *Nature* **375**, 21–22.
- Partridge, J. C., Shand, J., Archer, S. N., Lythgoe, J. N., and van Groningen-Luyben, W. A. H. M. (1989). Interspecific variation in the visual pigments of deep-sea fishes. *J. Comp. Physiol. A* **164**, 513–529.
- Partridge, J. C., Archer, S. N. and van Oostrum, J. (1992). Single and multiple visual pigments in deep-sea fishes. *J. Mar. Biol. Assn. UK* **72**, 113–130.
- Philp, A. R., Bellingham, J., Garcia-Fernandez, J. and Foster, R. G. (2000). A novel rod-like opsin isolated from the extra-retinal photoreceptors of teleost fish. *FEBS Lett.* **468**, 181–188.
- Saitou, N. and Nei, M. (1987). The neighbor-joining method: A new method for reconstructing phylogenetic trees. *Mol. Biol. Evol.* **4**, 406–425.
- Sakmar, T. P., Franke, R. R. and Khorana, G. H. (1989). Glutamic acid-113 serves as the retinylidene Schiff base counterion in bovine rhodopsin. *Proc. Natl. Acad. Sci. USA* **86**, 8309–8313.
- Schertler, G. F. and Hargrave, P. A. (1995). Projection structure of frog rhodopsin in two crystal forms. *Proc. Natl. Acad. Sci. USA* **92**, 11578–11582.
- Sun, H., Macke, J. P. and Nathans, J. (1997). Mechanisms of spectral tuning in the mouse green cone pigment. *Proc. Natl. Acad. Sci. USA* **94**, 8860–8865.
- Terakita, A., Yamashita, T. and Shichida, Y. (2000). Highly conserved glutamic acid in the extracellular IV-V loop in rhodopsins acts as the counterion in retinochrome, a member of the rhodopsin family. *Proc. Natl. Acad. Sci. USA* **97**, 14263–14267.
- Wang, Z., Asenjo, A. B. and Oprian, D. D. (1993). Identification of the Cl(–)-binding site in the human red and green color vision pigments. *Biochemistry* **32**, 2125–2130.
- Widder, E. A., Latz, M. F. and Case, J. F. (1983). Marine bioluminescence spectra measured with an optical multichannel detection system. *Biol. Bull.* **165**, 719–810.
- Widder, E. A., Latz, M. F., Herring, P. J. and Case, J. F. (1984). Far-red bioluminescence from two deep-sea species. *Science* **225**, 512–514.
- Williams, A. J., Hunt, D. M., Bowmaker, J. K., and Mollon, J. D. (1992). The polymorphic photopigments of the marmoset: spectral tuning and genetic basis. *EMBO J.* **11**, 2039–2045.
- Yokoyama, R., Knox, B. E. and Yokoyama, S. (1995). Rhodopsin from the fish, *Astyanax*: Role of tyrosine 261 in the red shift. *Invest. Ophthalmol. Vis. Sci.* **36**, 939–945.
